# Supplementary material for: Deformation characteristics and exploratory data analysis of rainfall-induced rotational landslide: A case study of the Zhutoushan landslide in Nanjing, China
Source: Copernicus journal article supplement (doi:10.5194/nhess-2020-175), 2020-06-15
Supplement: Supplementary file [file nhess-2020-175-AC3-supplement.pdf]

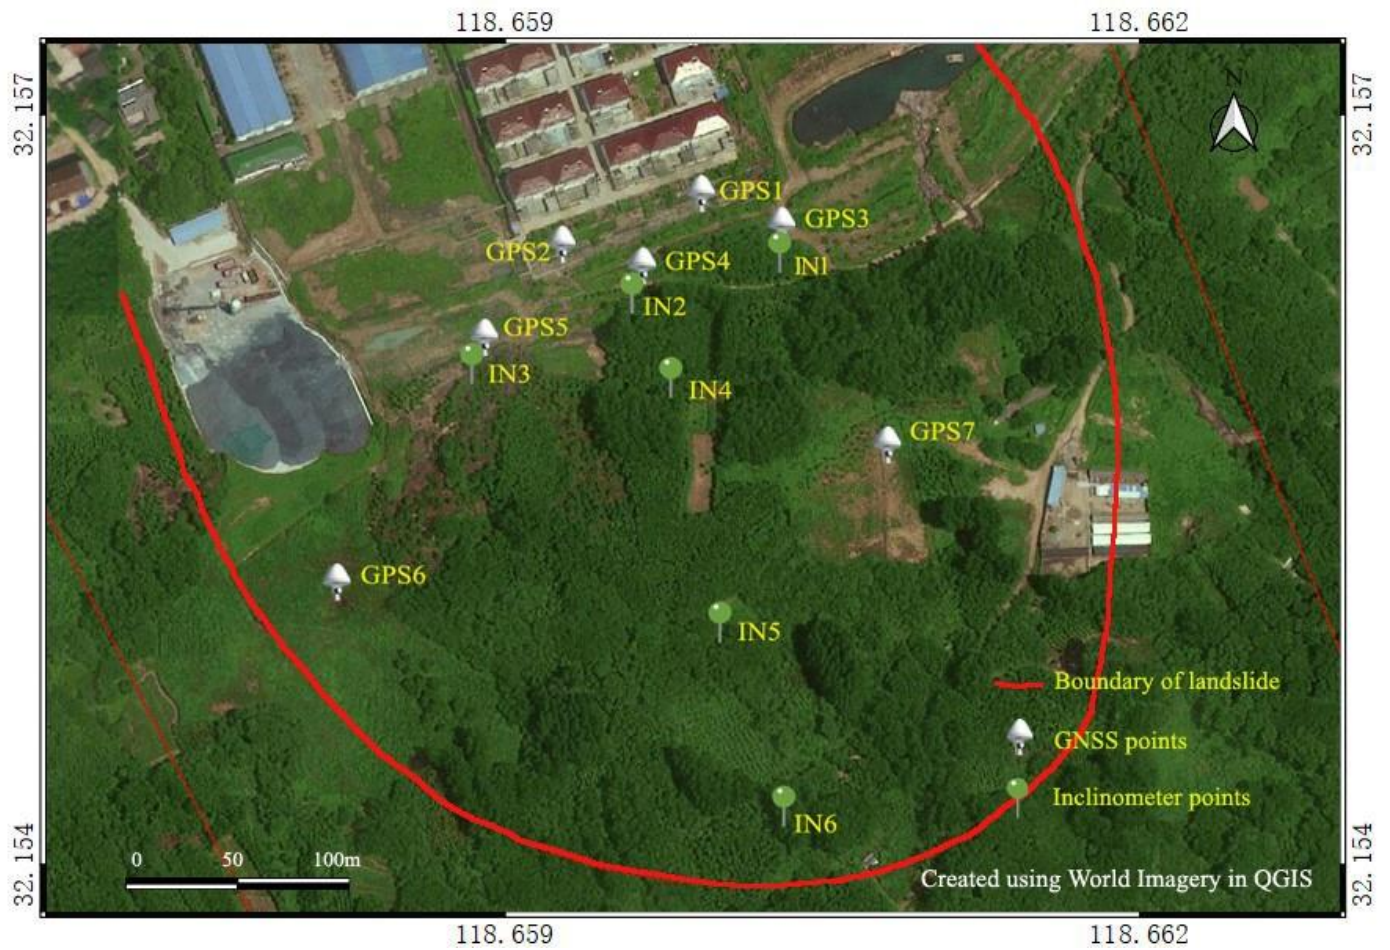

Figure 1 Location of the studied landslide site

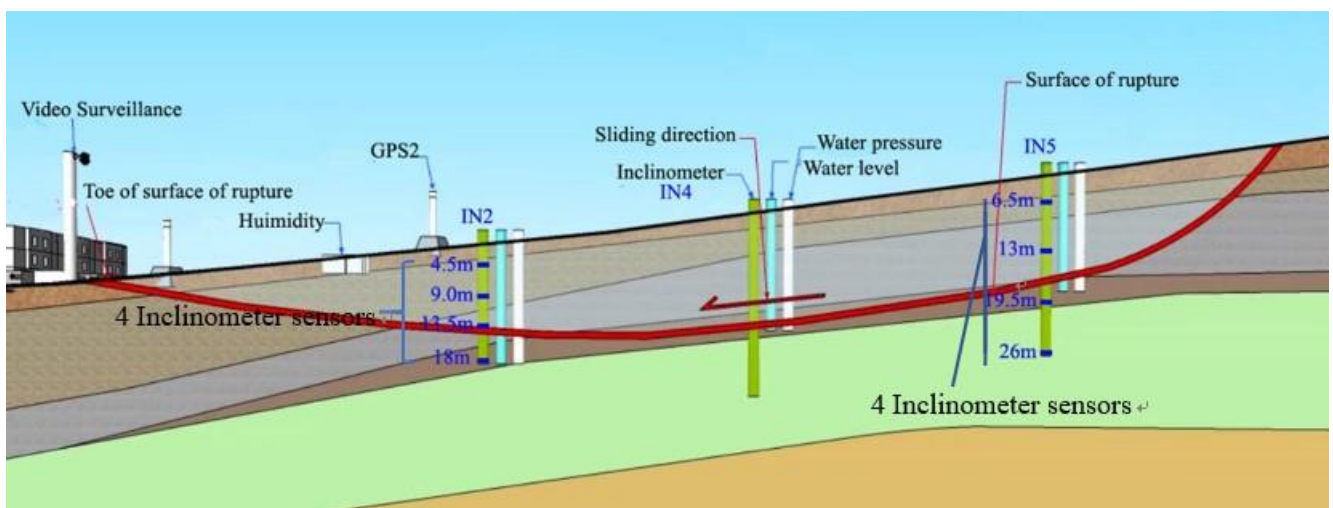

Figure 2 Positions of the monitoring instruments

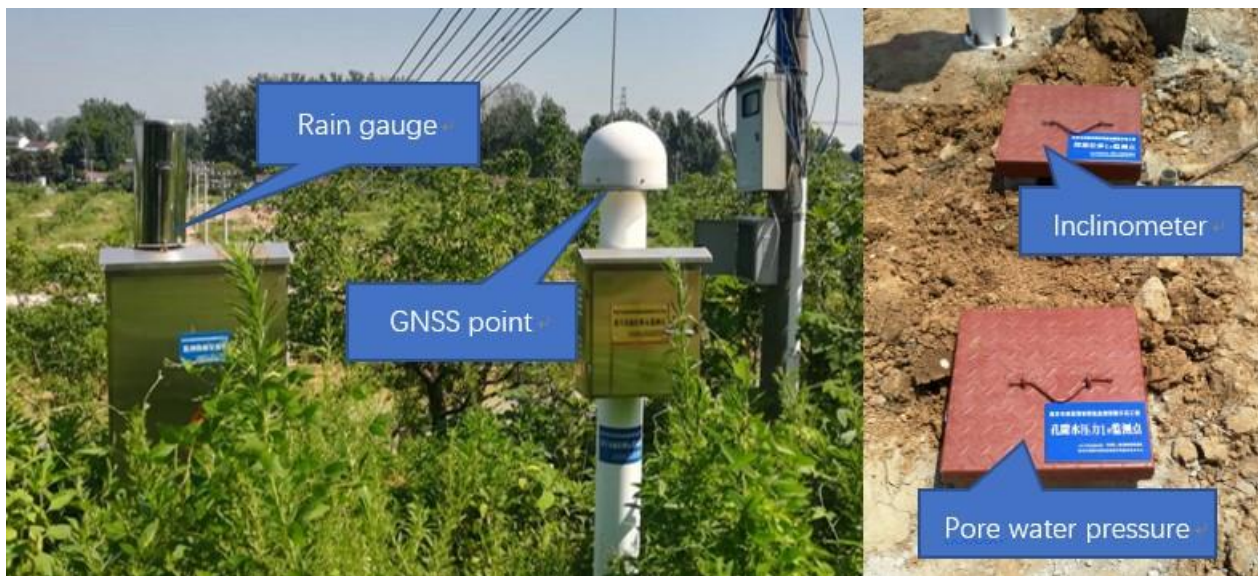

Figure 3 Monitoring instruments on the landslide

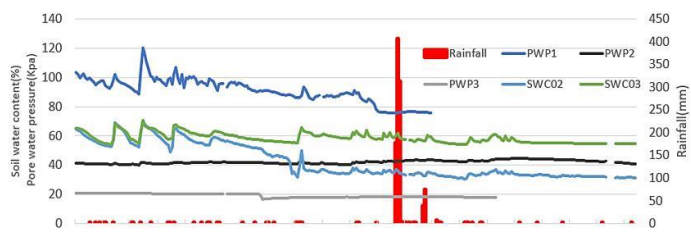

(a) Soil water content, pore water pressure and rainfall

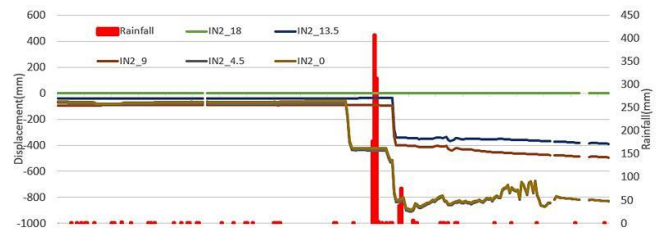

(b) Inclinometer and rainfall

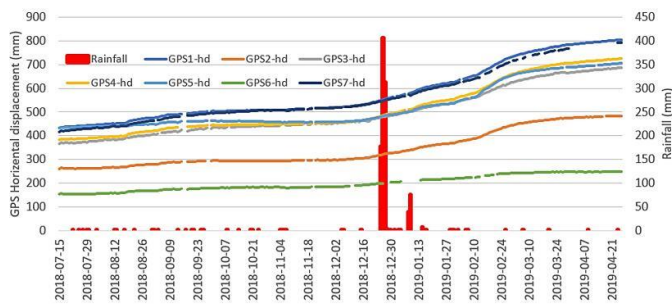

(c) GPS horizontal displacement and rainfall

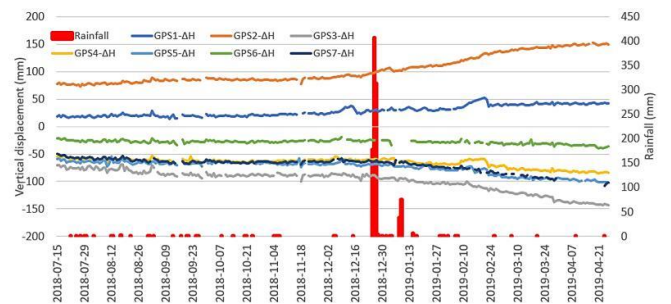

(d) GPS vertical displacement and rainfall

Figure 4 Relationship between rainfall and the other monitoring data



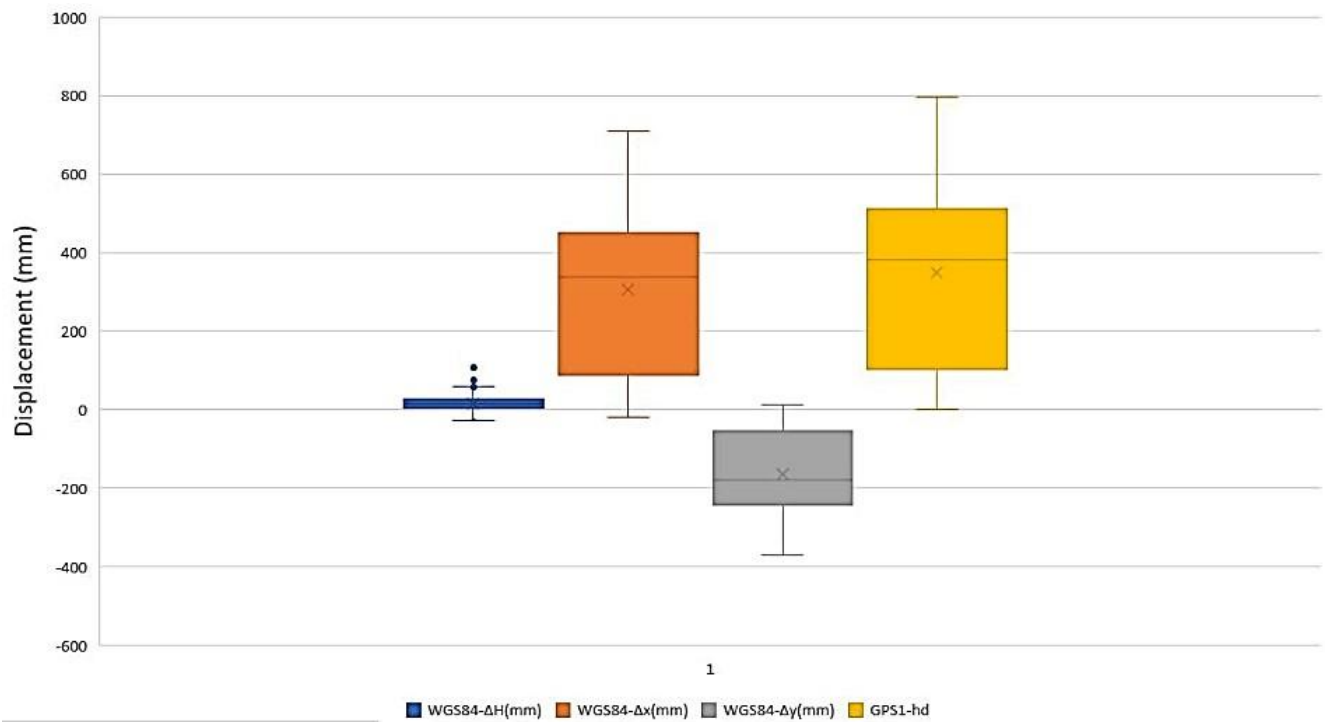

Figure 5 Box plots of GPS

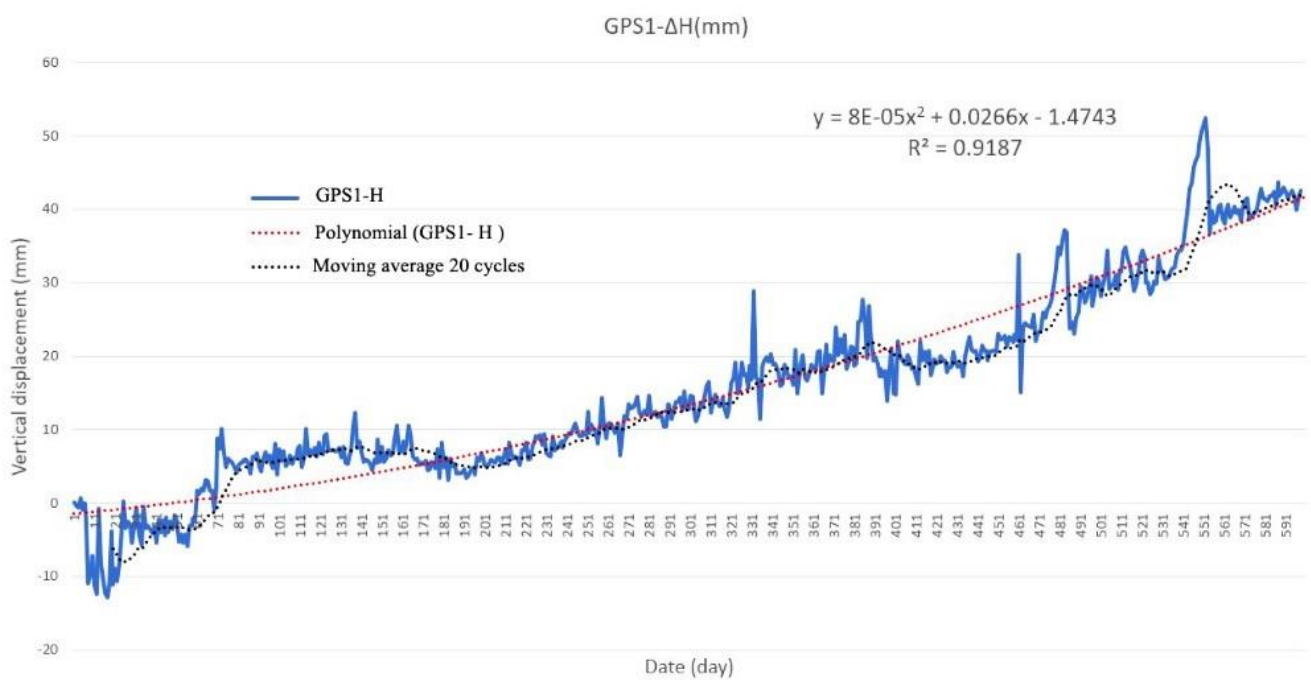

Figure 6 Vertical displacement and its fitting

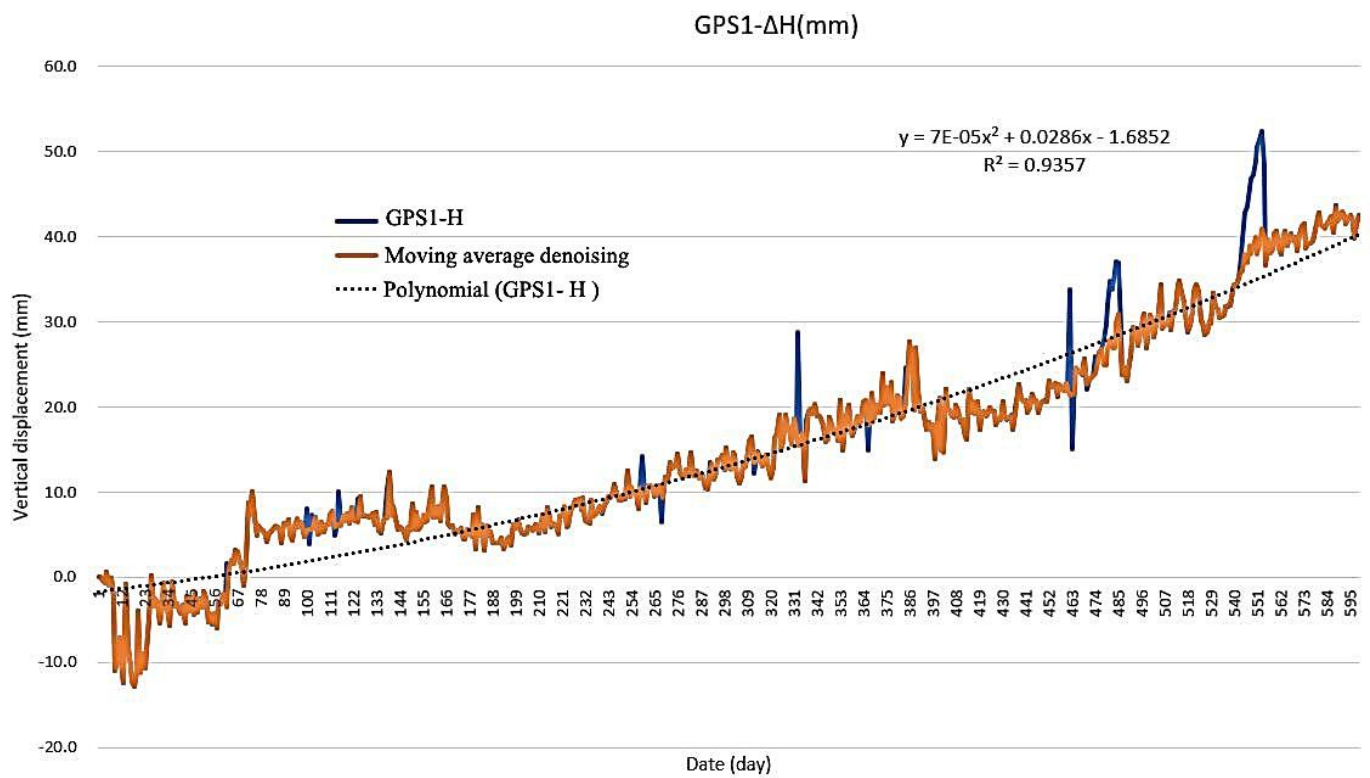

Figure 7 Vertical displacement and its fitting

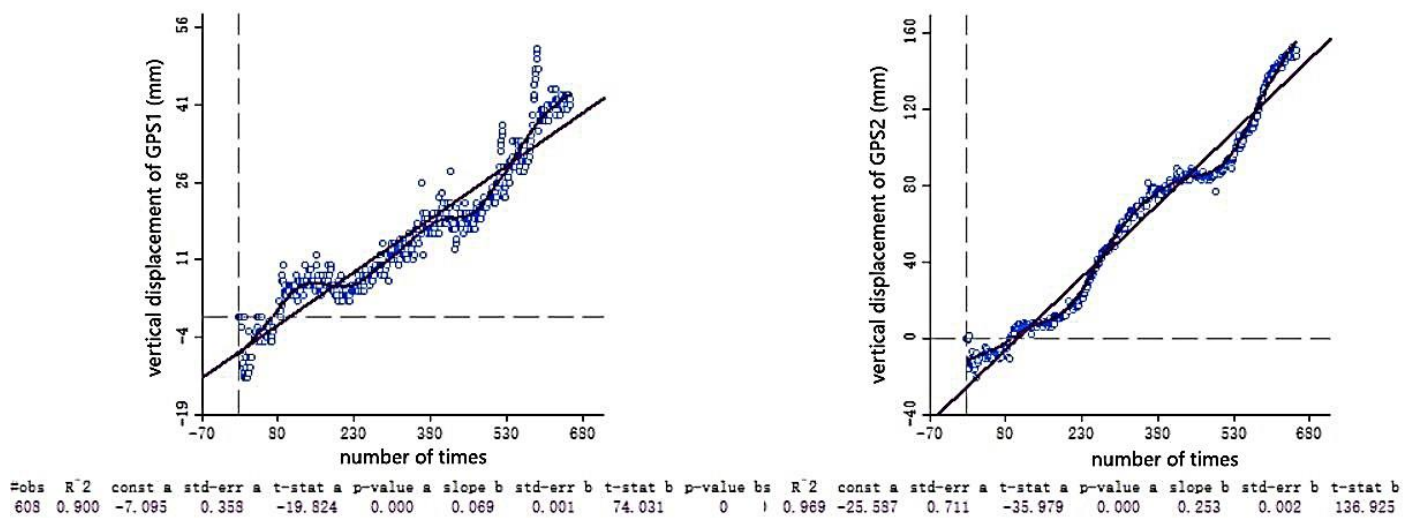

Figure 8 Scatter plots of GPS1 and GPS2

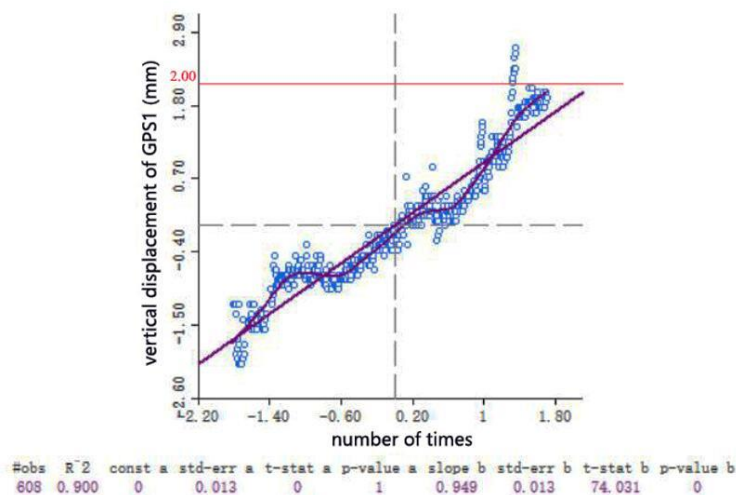

(a) Standardized data of GPS1

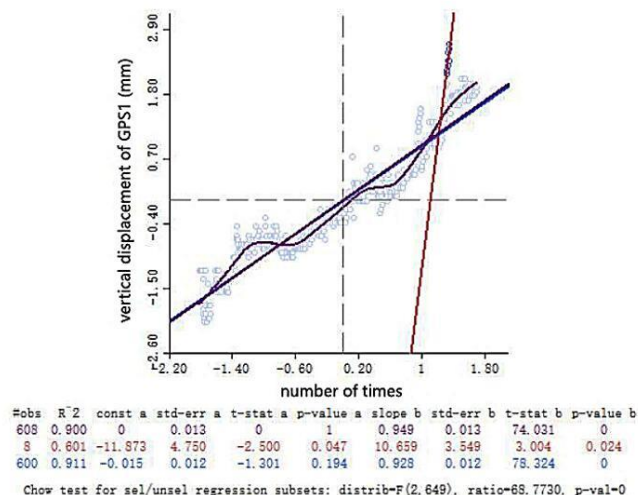

(b) Brushing the scatter plot of GPS1

Figure 9 Analysis data of GPS1

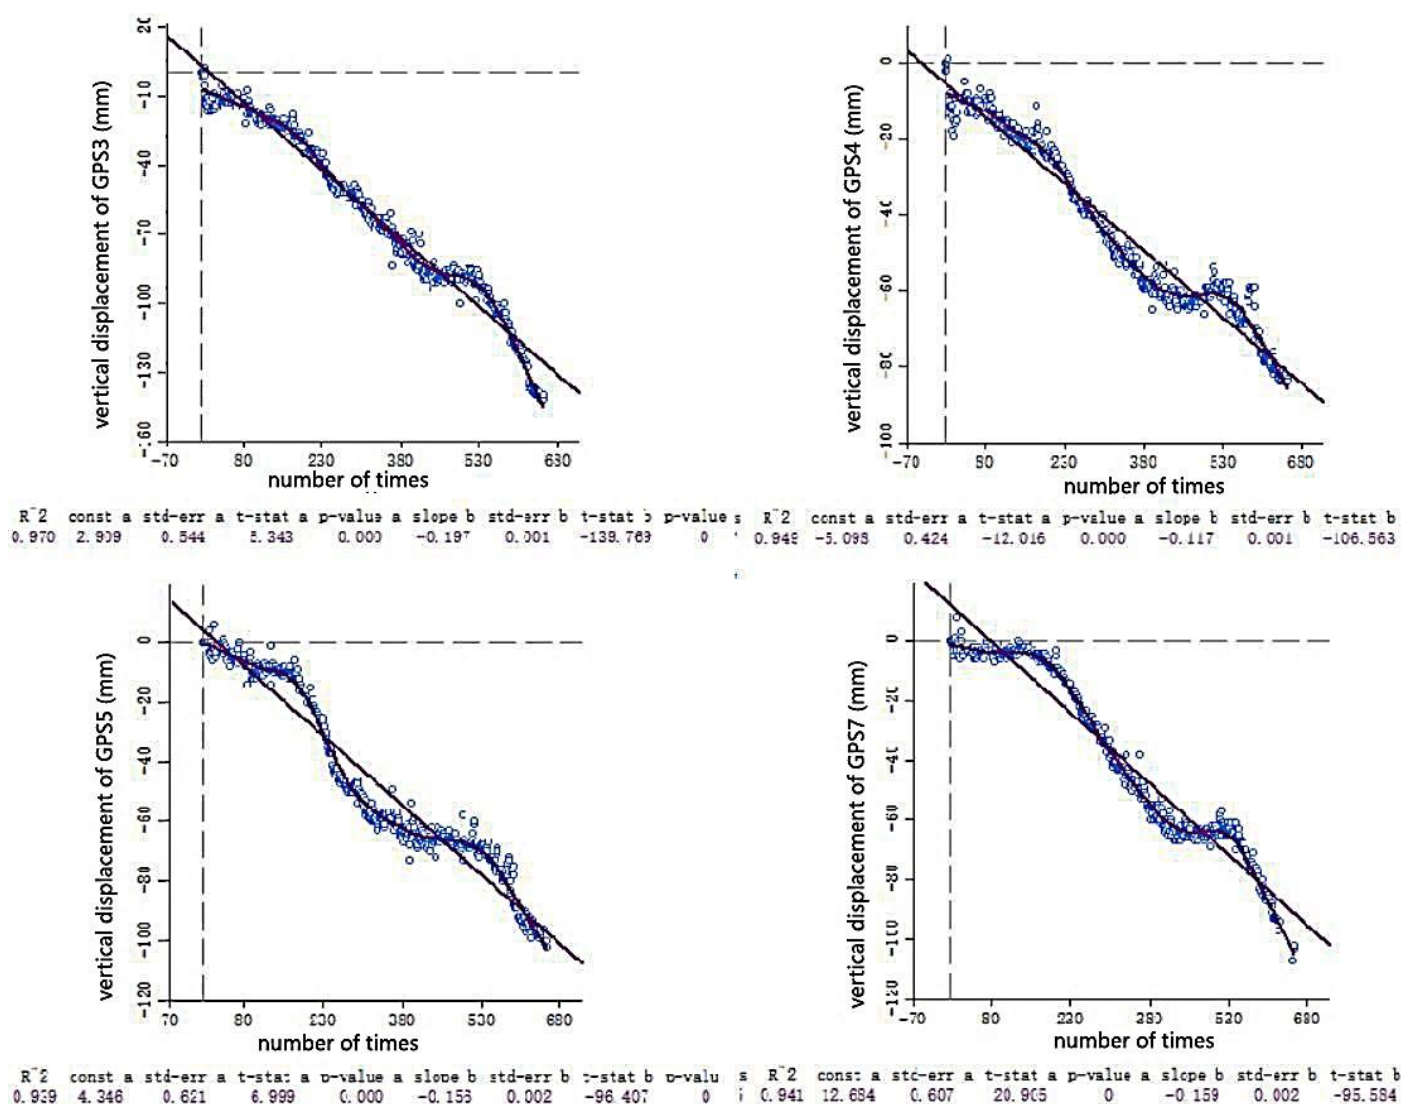

Figure 10 Scatter plots of GPS3 GPS4 GPS5 and GPS7

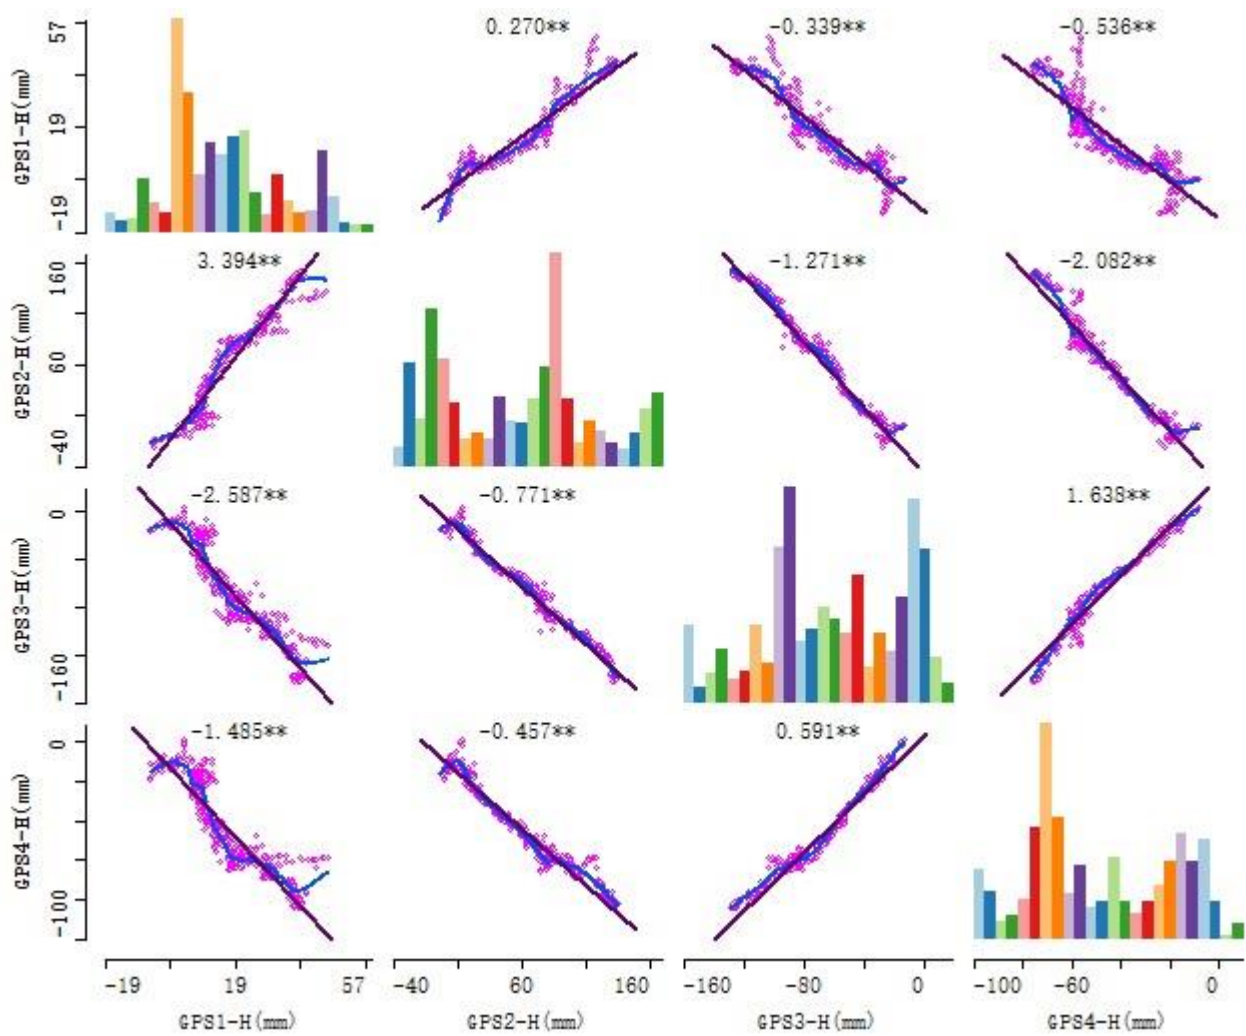

Figure 11 Scatter plot matrix between GPS1 GPS2 GPS3 and GPS4

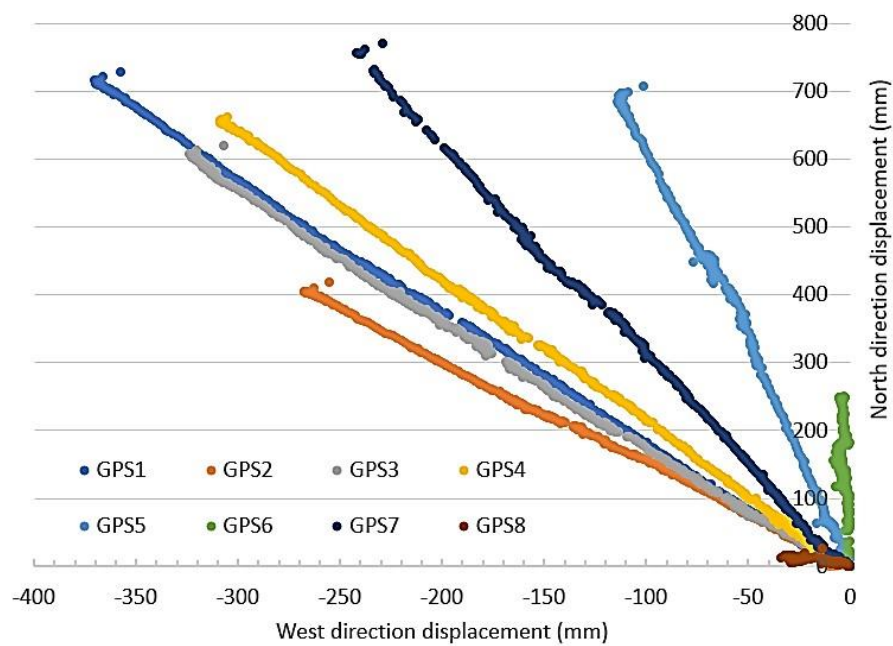

Figure 12 GPS displacement from July 14th 2017 to May 1st 2019



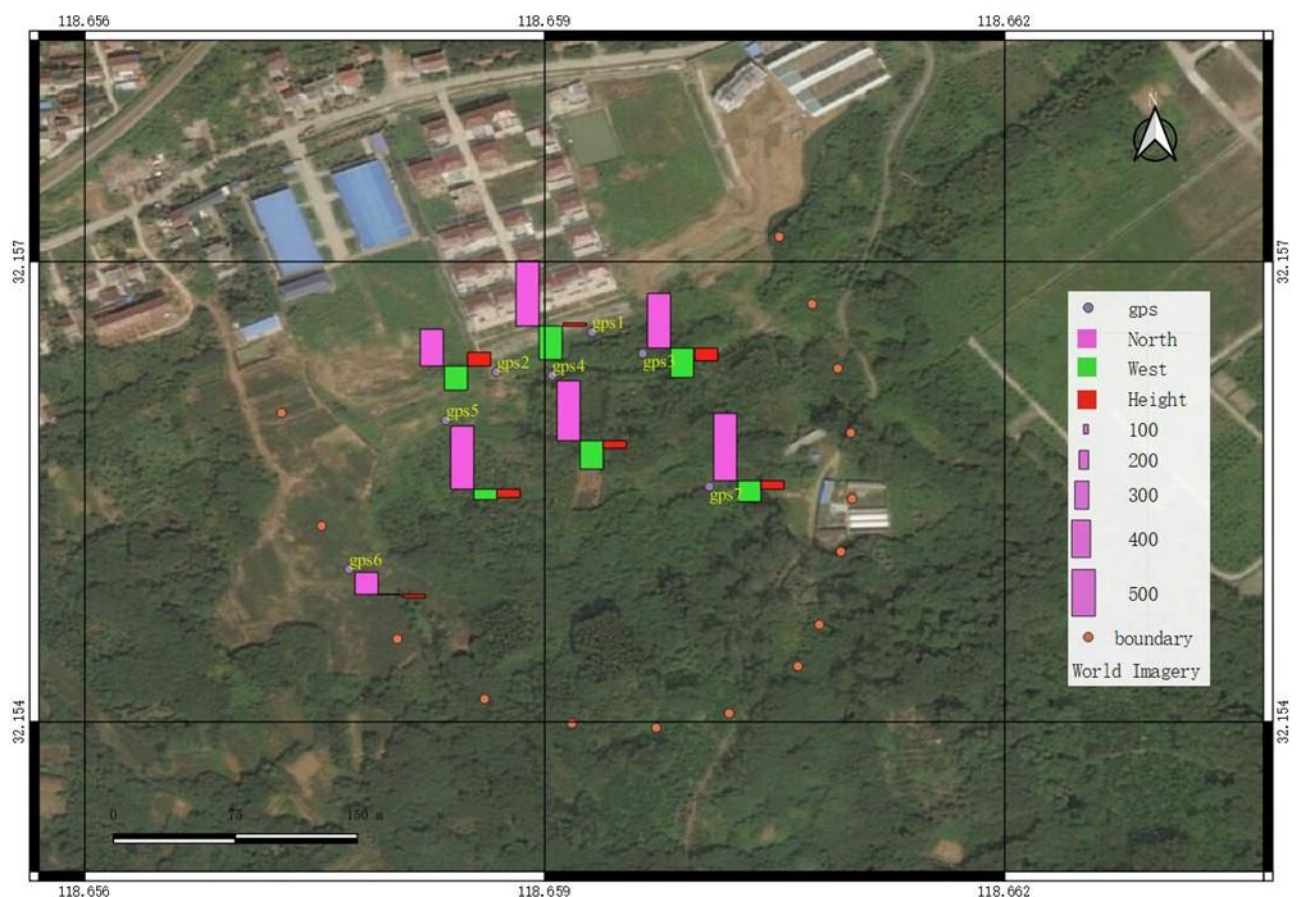

Figure 13 Surface displacement visualization

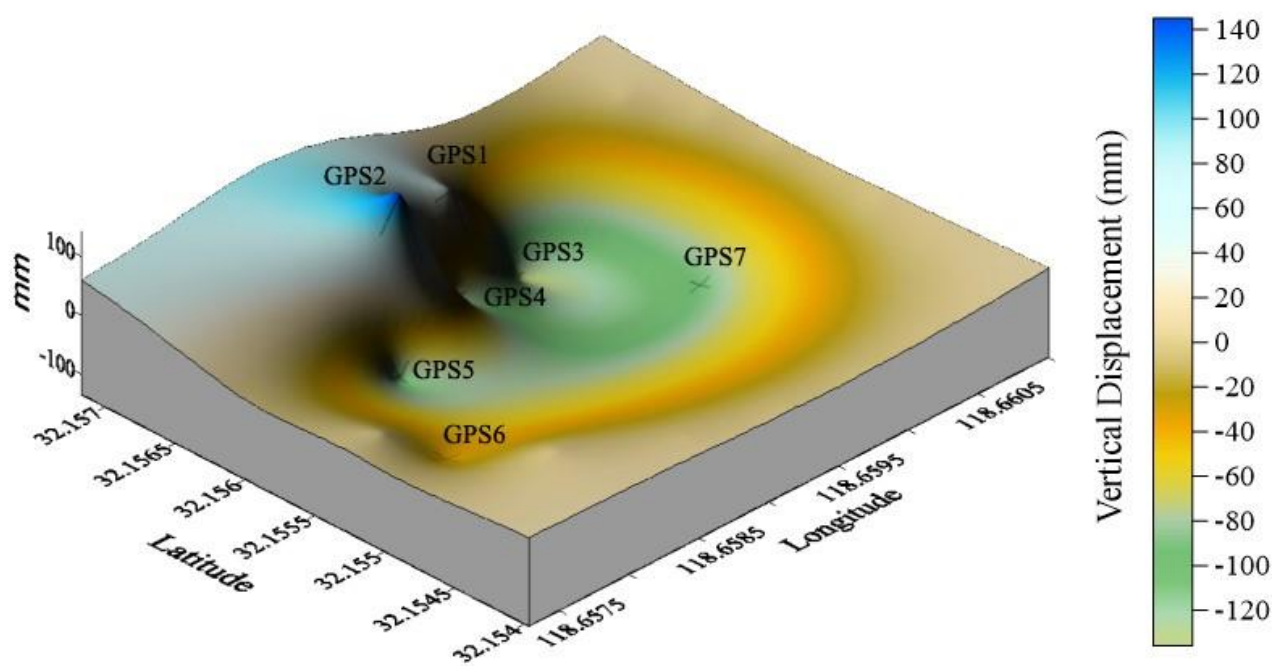

Figure 14 3D graph on April 8th 2019

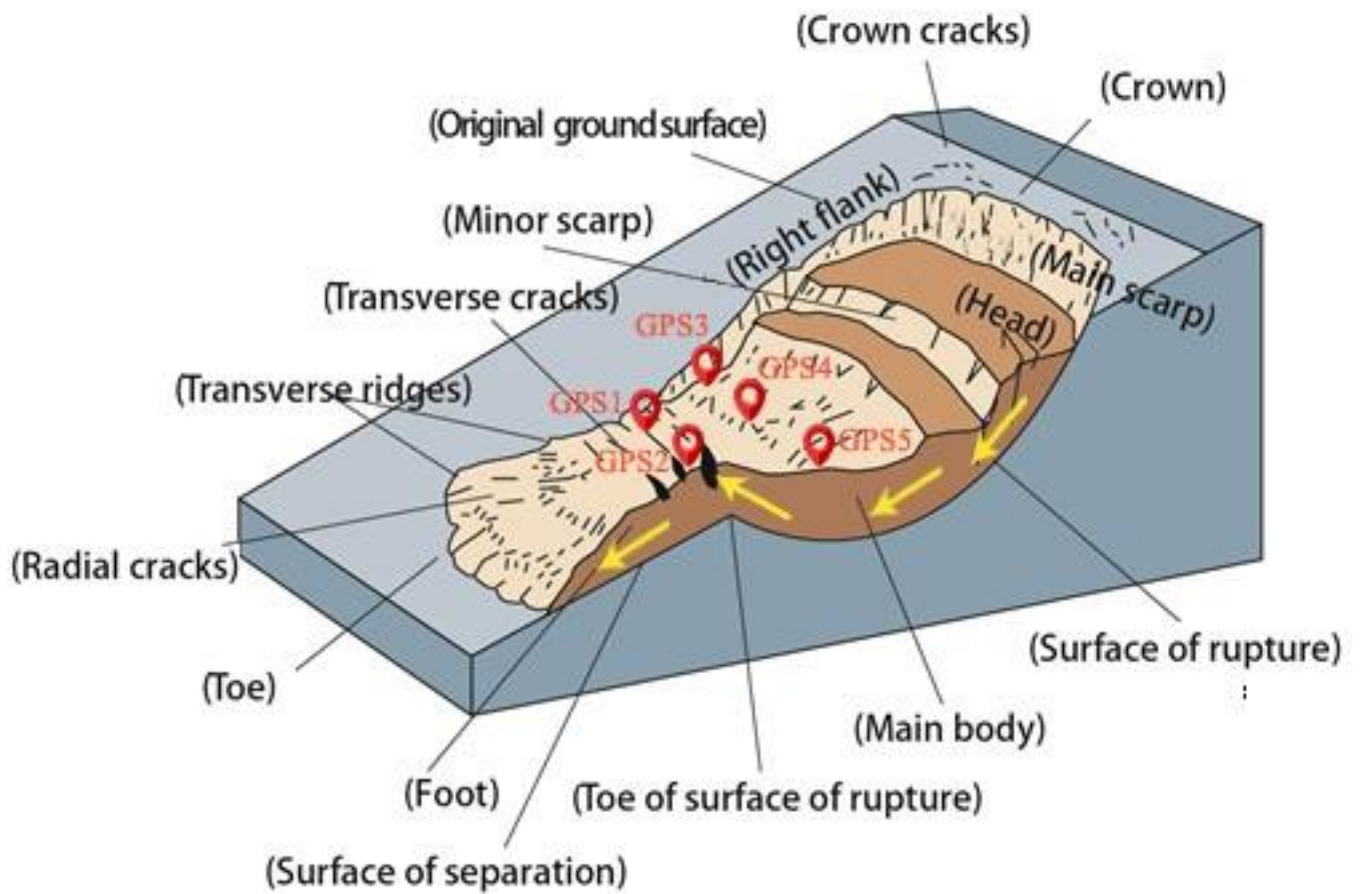

Figure 15 Zhutoushan landslide type based on Varnes 1978
